# Supplementary material
Source: PubMed Central journal article supplement (PMC6383716)
Supplement: NIHMS1501122-supplement-Supp2.pdf [file NIHMS1501122-supplement-Supp2.pdf]

Table S2: Computational time (in seconds) to run different Bayesian variable selection methods for 100 MCMC iterations, as a function of sample size and the number of covariates. Compared here are Bayes Ridge (BRR), Bayes Lasso (BL), Bayes LMM (BLMM), and Bayes  $C\pi$ . BAKR is assessed under both its full model specification ( $V = 1$ ), as well as under its empirical factor representation ( $V \approx 0.9$  and  $0.8$ , respectively). Sample sizes considered were  $n = 100, 500, 1000$ , and  $2000$ . The number of covariates considered were  $p = 1 \times 10^3, 1 \times 10^4, 5 \times 10^4$ , and  $1 \times 10^5$ , respectively. Note that only cases in which  $p > n$  were timed. Results are based on 100 different simulated datasets. Standard errors across these replicates for each model are given the parentheses.

| Samples    | Covariates      | Other Methods       |              |               |                    | BAKR Models   |                 |                    |
|------------|-----------------|---------------------|--------------|---------------|--------------------|---------------|-----------------|--------------------|
|            |                 | BRR                 | BL           | BLMM          | $BC\pi$            | $V = 1$       | $V \approx 0.9$ | $V \approx 0.8$    |
| $n = 100$  | $1 \times 10^3$ | 0.09 (0.04)         | 0.20 (0.09)  | 0.14 (0.02)   | 0.12 (0.09)        | 0.03 (0.00)   | 0.02 (0.00)     | <b>0.01 (0.00)</b> |
|            | $1 \times 10^4$ | 0.58 (0.09)         | 0.97 (0.12)  | 0.60 (0.11)   | 0.62 (0.18)        | 0.03 (0.00)   | 0.02 (0.00)     | <b>0.01 (0.00)</b> |
|            | $5 \times 10^4$ | 2.44 (0.20)         | 4.46 (0.12)  | 2.72 (0.21)   | 2.85 (0.17)        | 0.03 (0.00)   | 0.02 (0.00)     | <b>0.01 (0.00)</b> |
|            | $1 \times 10^5$ | 4.76 (0.19)         | 8.64 (0.21)  | 4.81 (0.20)   | 5.48 (0.14)        | 0.03 (0.00)   | 0.02 (0.00)     | <b>0.01 (0.00)</b> |
| $n = 500$  | $1 \times 10^3$ | 0.39 (0.18)         | 0.36 (0.17)  | 2.29 (0.58)   | <b>0.30 (0.15)</b> | 2.64 (0.01)   | 1.61 (0.00)     | 0.93 (0.00)        |
|            | $1 \times 10^4$ | 1.91 (0.27)         | 2.36 (0.23)  | 3.57 (0.43)   | 2.08 (0.23)        | 2.66 (0.02)   | 1.79 (0.01)     | <b>1.13 (0.00)</b> |
|            | $5 \times 10^4$ | 8.21 (0.51)         | 10.61 (0.49) | 9.91 (0.10)   | 8.94 (0.32)        | 2.67 (0.02)   | 1.83 (0.00)     | <b>1.19 (0.00)</b> |
|            | $1 \times 10^5$ | 15.89 (0.36)        | 19.71 (1.43) | 18.80 (1.93)  | 17.81 (0.21)       | 2.65 (0.01)   | 1.84 (0.01)     | <b>1.20 (0.00)</b> |
| $n = 1000$ | $1 \times 10^3$ | –                   | –            | –             | –                  | –             | –               | –                  |
|            | $1 \times 10^4$ | <b>3.57 (0.37)</b>  | 3.57 (0.48)  | 11.09 (0.47)  | 3.70 (0.53)        | 21.06 (0.13)  | 13.71 (0.07)    | 8.53 (0.02)        |
|            | $5 \times 10^4$ | 14.80 (0.53)        | 16.62 (0.72) | 22.92 (0.76)  | 15.71 (0.11)       | 21.20 (0.32)  | 14.36 (0.17)    | <b>9.17 (0.08)</b> |
|            | $1 \times 10^5$ | 28.93 (0.41)        | 33.47 (0.57) | 36.57 (0.46)  | 31.17 (0.39)       | 21.01 (0.10)  | 14.44 (0.10)    | <b>9.30 (0.09)</b> |
| $n = 2000$ | $1 \times 10^3$ | –                   | –            | –             | –                  | –             | –               | –                  |
|            | $1 \times 10^4$ | <b>6.37 (0.63)</b>  | 6.91 (0.83)  | 51.42 (2.11)  | 6.56 (0.83)        | 164.40 (0.58) | 104.97 (1.01)   | 63.98 (0.90)       |
|            | $5 \times 10^4$ | <b>29.55 (0.69)</b> | 32.29 (0.55) | 75.37 (3.20)  | 29.98 (0.63)       | 163.57 (1.81) | 109.40 (0.52)   | 70.17 (0.60)       |
|            | $1 \times 10^5$ | <b>58.86 (0.30)</b> | 63.63 (0.43) | 101.69 (1.47) | 61.16 (0.42)       | 163.53 (1.94) | 111.45 (1.11)   | 72.09 (0.98)       |
